# Supplementary material
Source: PubMed Central journal article supplement (PMC1964860)

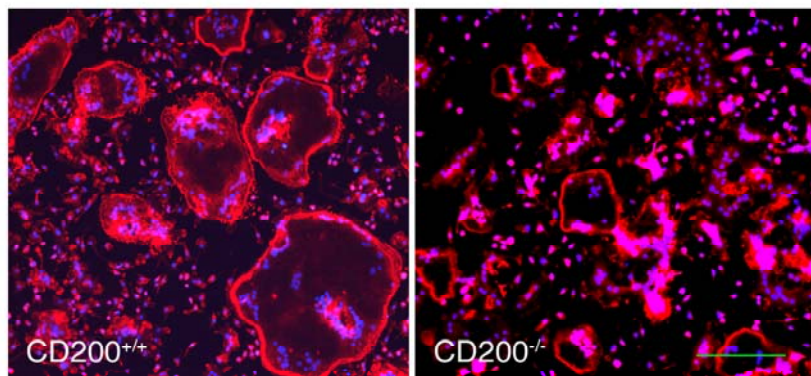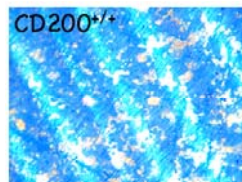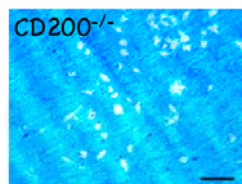

A

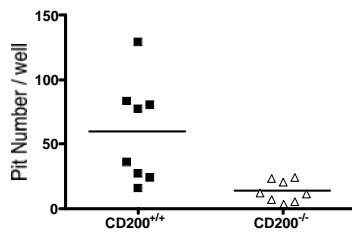

B

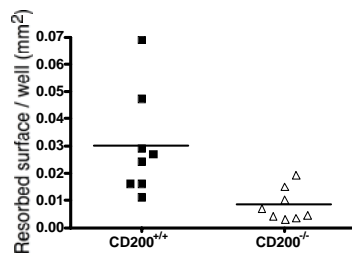

C

Supplement: pnas_0702811104_1.pdf [file pnas_0702811104_1.pdf]

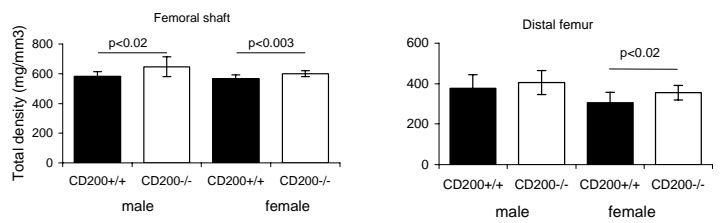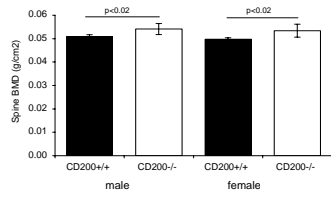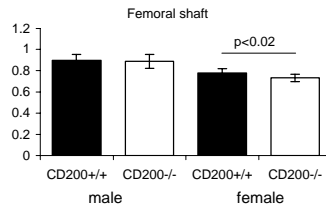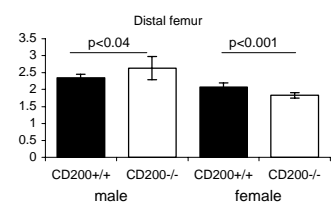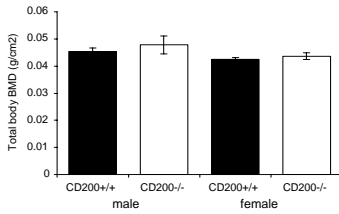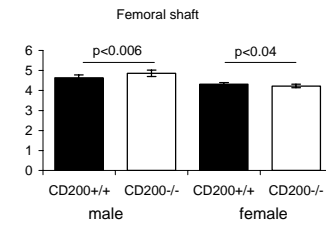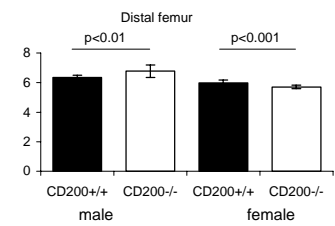

**A**

**B**

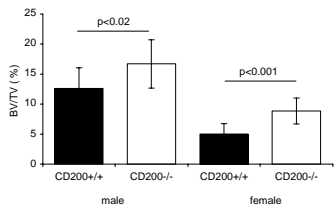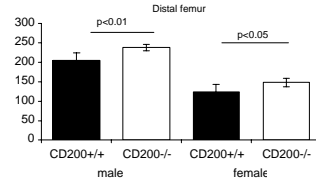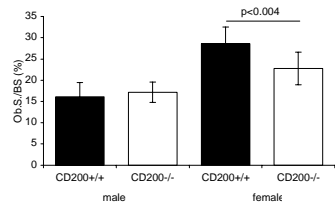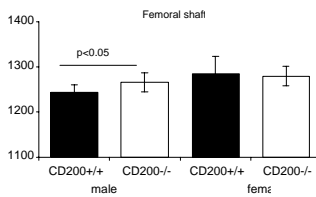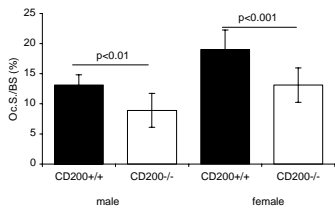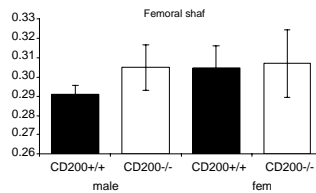

**C**

**D**

Supplement: pnas_0702811104_2.pdf [file pnas_0702811104_2.pdf]
